# Supplementary material for: Exploring the expertise of large language models in materials science and metallurgical engineering
Source: Royal Society of Chemistry journal article supplement (doi:10.1039/d4dd00319e), 2025-01-01

## Supplementary Materials

Table 1: The six questions remove from the original MaSCQA and the reason for removal.

| Question ID   | Questions                                                                                                                                                                                                                                                                                                                                                                                                                                                                                                                                                                                                                                                                                           | "Correct answer" | Reason for removal                                                          |
|---------------|-----------------------------------------------------------------------------------------------------------------------------------------------------------------------------------------------------------------------------------------------------------------------------------------------------------------------------------------------------------------------------------------------------------------------------------------------------------------------------------------------------------------------------------------------------------------------------------------------------------------------------------------------------------------------------------------------------|------------------|-----------------------------------------------------------------------------|
| G-META-22-39  | ['Figures P, Q, R and S (in the image) schematically show the atomic dipole moments in the absence of external magnetic field. Which one of the following is the correct mapping of nature of magnetism to atomic dipole moments? \n', '(A) P - Diamagnetism, Q - Antiferromagnetism, R - Paramagnetism, S - Ferromagnetism (B) P - Ferromagnetism, Q - Antiferromagnetism, R - Diamagnetism, S - Paramagnetism (C) P - Paramagnetism, Q - Ferromagnetism, R - Diamagnetism, S - Antiferromagnetism (D) P - Ferromagnetism, Q - Diamagnetism, R - Antiferromagnetism, S - Paramagnetism ']                                                                                                          | B                | No image provided                                                           |
| G-XEC-2020-22 | ['Given: Diffusivity of carbon in iron at 1100 °C is $6.0 \times 10^{-11} \text{ m}^2 \text{ s}^{-1}$ and $\text{erf}(z)$ from the image. A plain carbon steel sample containing 0.1 wt% carbon is undergoing carburization at 1100 °C in a carbon rich surroundings with fixed carbon content of 1.0 wt% all the time. The carburization time(in hours) necessary to achieve a carbon concentration of 0.46 wt% at a depth of 5mm at 1100 °C is?(round-off to the nearest integer). ']                                                                                                                                                                                                             | 77 to 83         | No image provided                                                           |
| G-XEC-2013-21 | ['A stress of 10 MPa is applied to an elastomer to generate a strain of 50%. The strain is held constant at this value. After 40 days at 20°C, the stress decreases to 5 MPa. What is the relaxation time constant for this material?']                                                                                                                                                                                                                                                                                                                                                                                                                                                             | Marks to all     | "Correct Answer" is Marks to all when it is a numerical question            |
| G-XEC-2013-22 | ['A stress of 10 MPa is applied to an elastomer to generate a strain of 50%. The strain is held constant at this value. After 40 days at 20°C, the stress decreases to 5 MPa. What will be the stress after 60 days at 20°C?']                                                                                                                                                                                                                                                                                                                                                                                                                                                                      | Marks to all     | "Correct Answer" is Marks to all when it is a numerical question            |
| G-META-20-7   | ['In green sand casting, which one of the following is NOT a part of the gating system?\n', '(A) Runner (B) Sprue (C) Riser (D) Pouring basin']                                                                                                                                                                                                                                                                                                                                                                                                                                                                                                                                                     | MARKS TO ALL     | Wrong question / answer because they are all part of the green sand casting |
| G-XEC-2016-14 | ['(Given: Universal gas constant, $R = 8.31 \text{ J mol}^{-1} \text{ K}^{-1}$ , Faraday's constant, $F = 96500 \text{ C mol}^{-1}$ ). A half cell consisting of pure Ni immersed in an aqueous solution containing $\text{Ni}^{2+}$ ions of unknown concentration, is galvanically coupled with another half cell consisting of pure Cd immersed in a 1M aqueous solution of $\text{Cd}^{2+}$ ions. The temperature is 25°C and pressure is 1 atm. The standard electrode reduction potentials of Ni and Cd are $-0.250 \text{ V}$ and $-0.403 \text{ V}$ , respectively. The voltage of the cell is found to be zero. The concentration(in micro molar) of $\text{Ni}^{2+}$ in the solution is '] | 6.00 : 7.30      | same question twice in the dataset                                          |

Figure 1: Graphical representation of the results shown in Table 4 of the article. a)MATCH, b) MCQ, c)MCQN and d)NUM. (+) means result obtained on Wanda, (\*) means results obtained on Mac Pro M1.

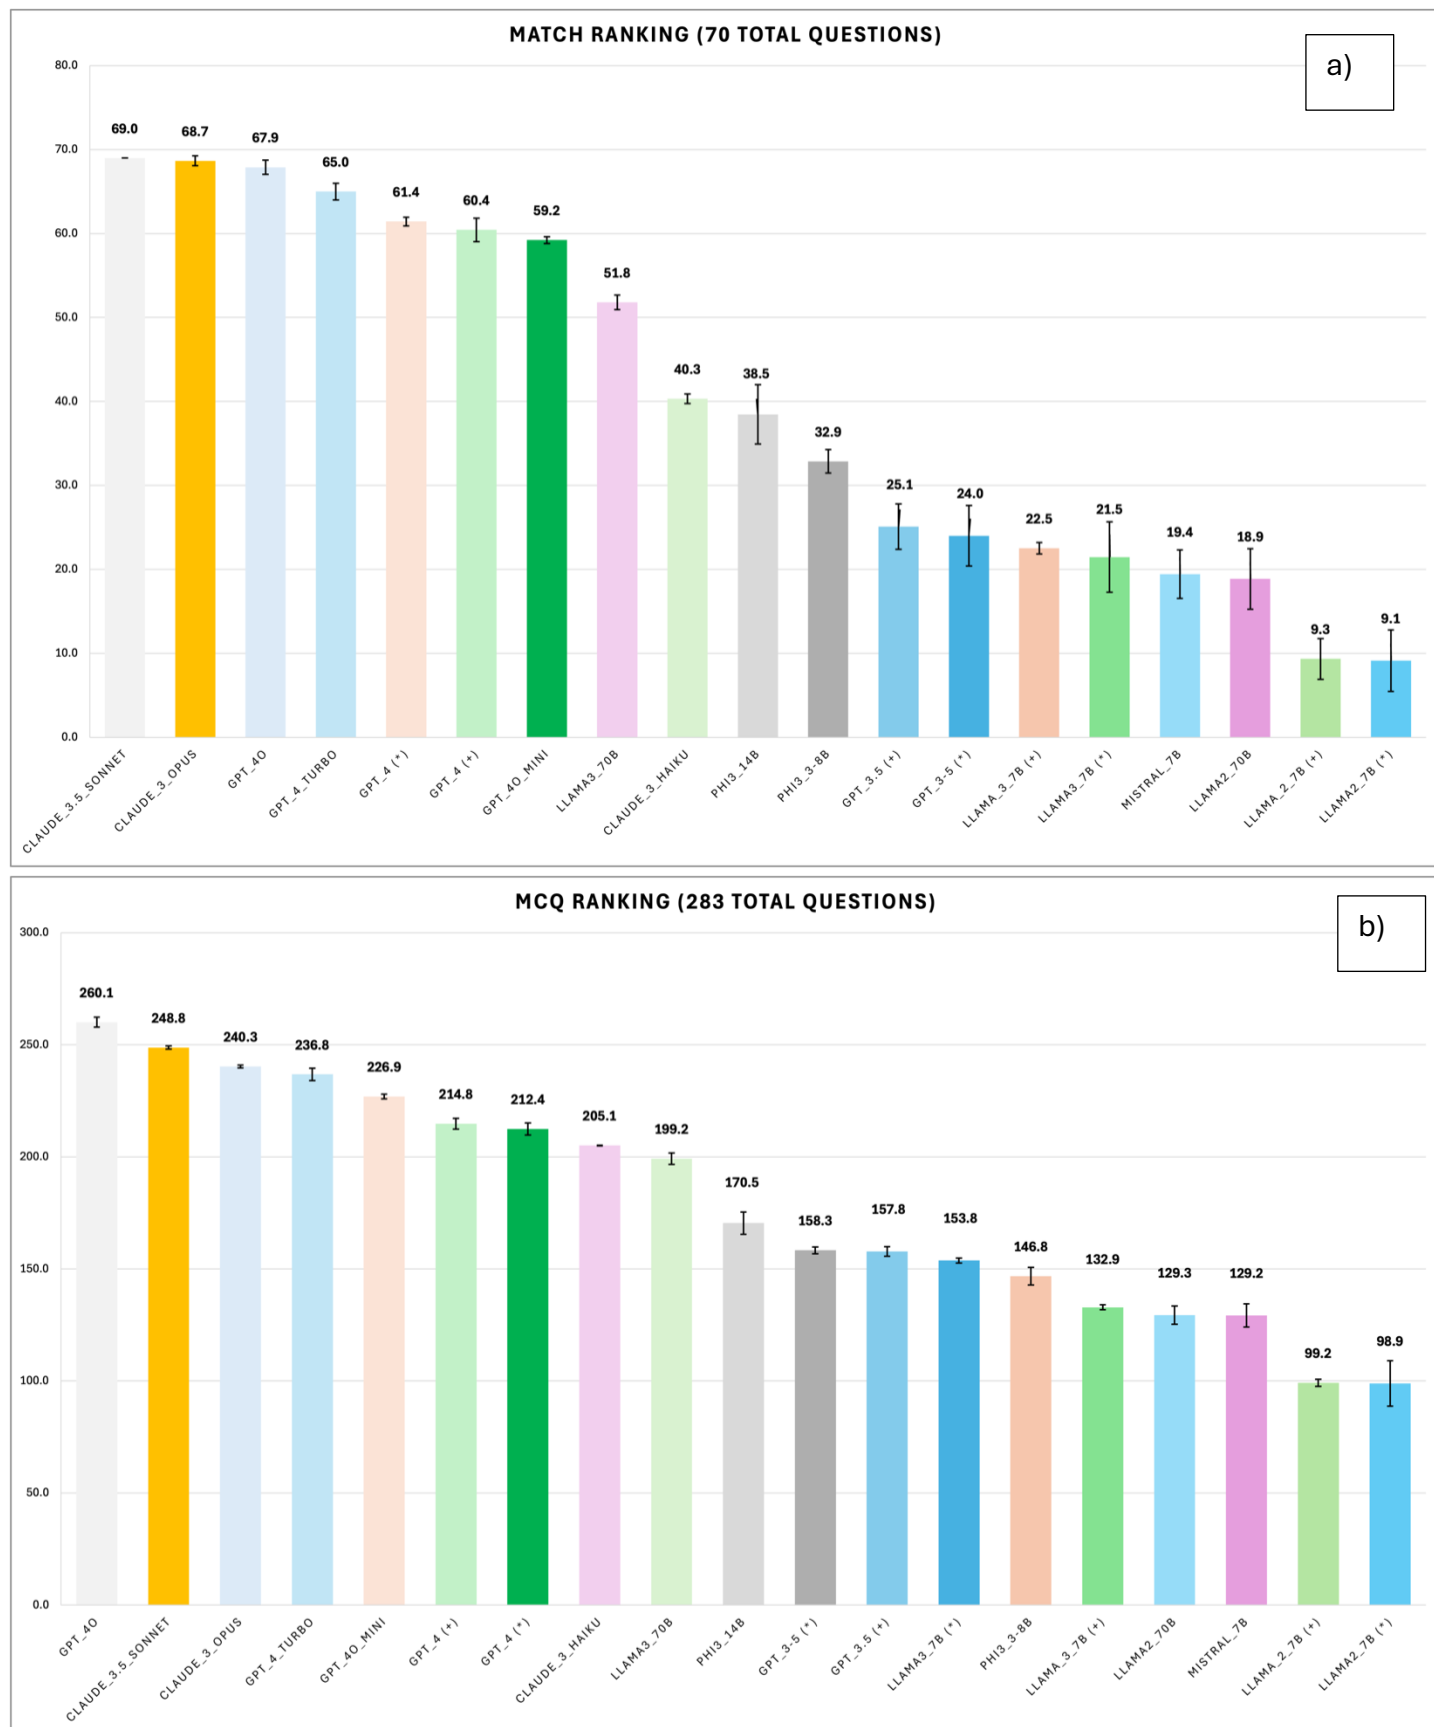

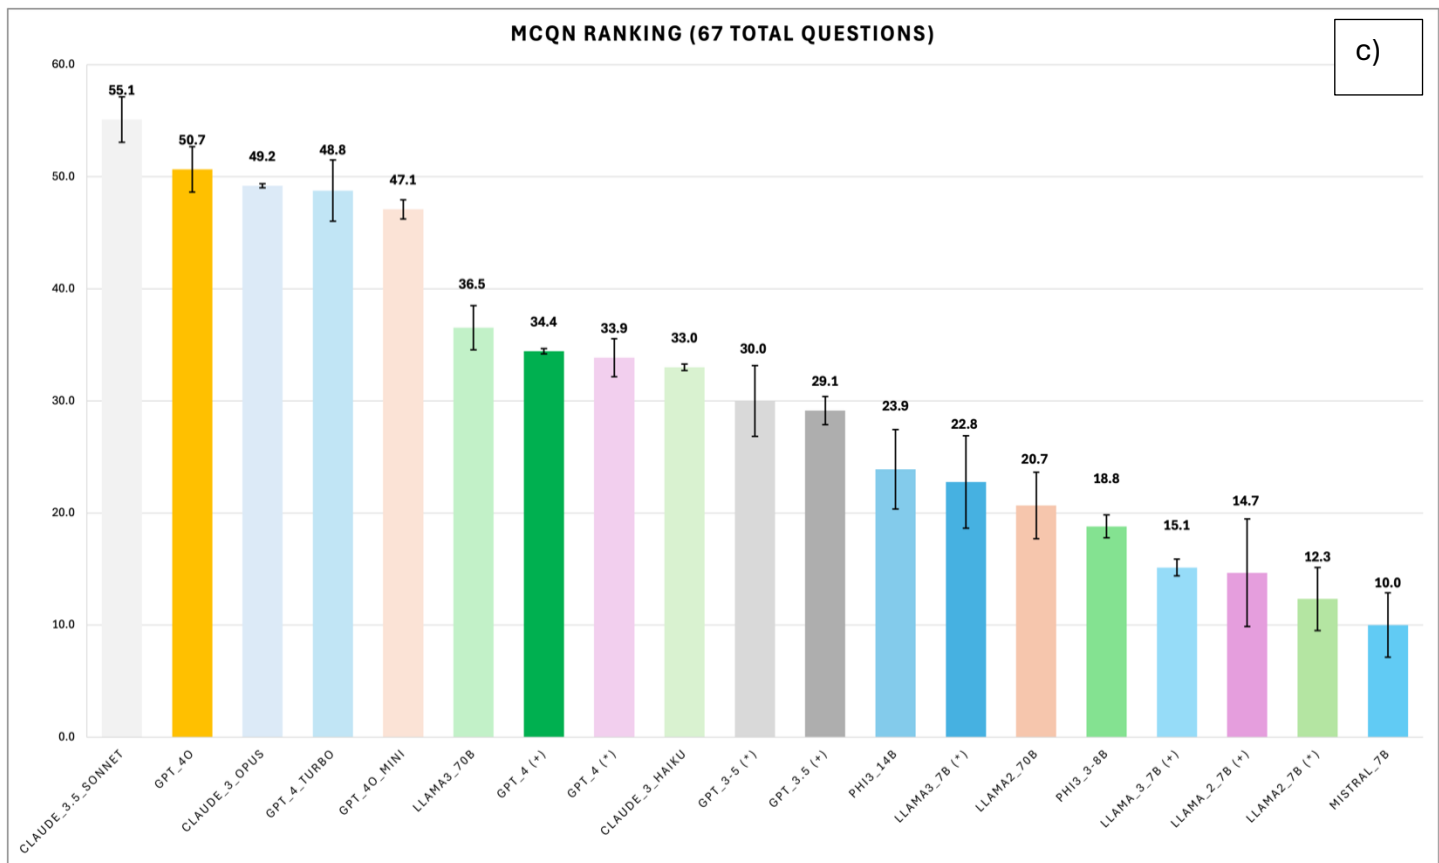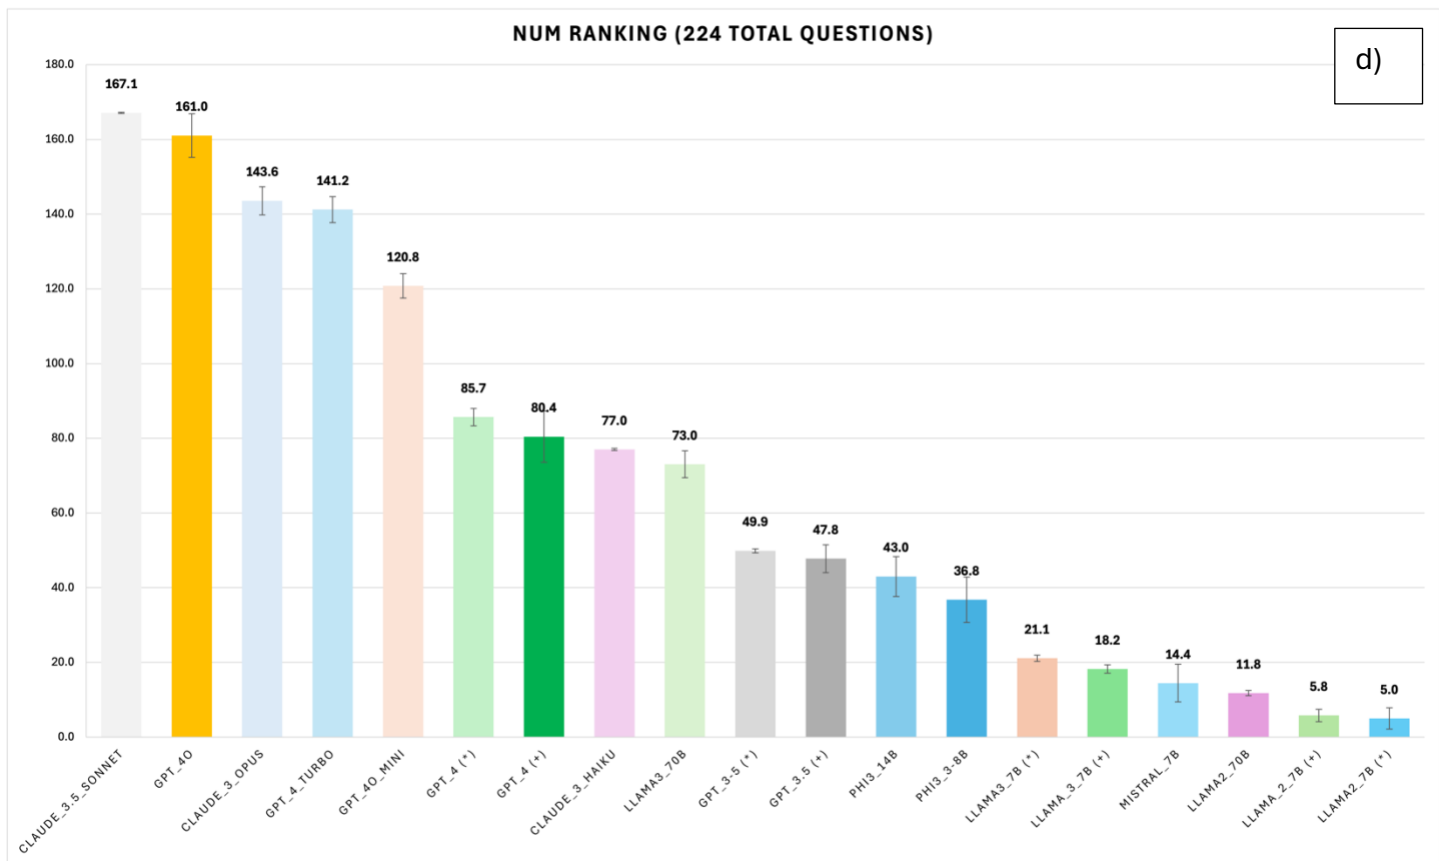

Supplement: d4dd00319e1.pdf [file d4dd00319e1.pdf]
